# Supplementary material for: Association between the CD24 Ala57Val polymorphism and risk for multiple sclerosis and systemic lupus erythematosus: a meta-analysis
Source: PubMed Central journal article supplement (PMC5381688; doi:10.1038/srep09557), 2015-04-01
Supplement: srep09557-s1.pdf [file srep09557-s1.pdf]

**Association between the *CD24* Ala57Val polymorphism and risk for multiple sclerosis and systemic lupus erythematosus: a meta-analysis**

Jian Huang\*, Yaqi Yang\*, Zibin Liang, Miaomiao Kang, Ying Kuang, Feng Li

Department of Anatomy and Neurobiology, Zhongshan School of Medicine, Sun Yat-sen University, Guangzhou, China

Correspondence to: Prof. Feng Li, Department of Anatomy and Neurobiology, Zhongshan School of Medicine, Sun Yat-sen University, Guangzhou 510080, China

Tel: +86-20-87332198

Email: lifeng@mail.sysu.edu.cn

\*These authors contributed equally to this work.

Supplementary Table 1. Scale for methodological quality assessment.

| <b>Criteria</b>                                                            | <b>Score</b> |
|----------------------------------------------------------------------------|--------------|
| <b><i>Selection</i></b>                                                    |              |
| Is the case definition adequate                                            | 1            |
| Representativeness of the cases                                            | 1            |
| Selection of controls                                                      | 1            |
| Definition of controls                                                     | 1            |
| <b><i>Comparability</i></b>                                                |              |
| Comparability of cases and controls on the basis of the design or analysis | 2            |
| <b><i>Exposure</i></b>                                                     |              |
| Ascertainment of exposure                                                  | 1            |
| Same method of ascertainment for cases and controls                        | 1            |
| Non-response rate                                                          | 1            |

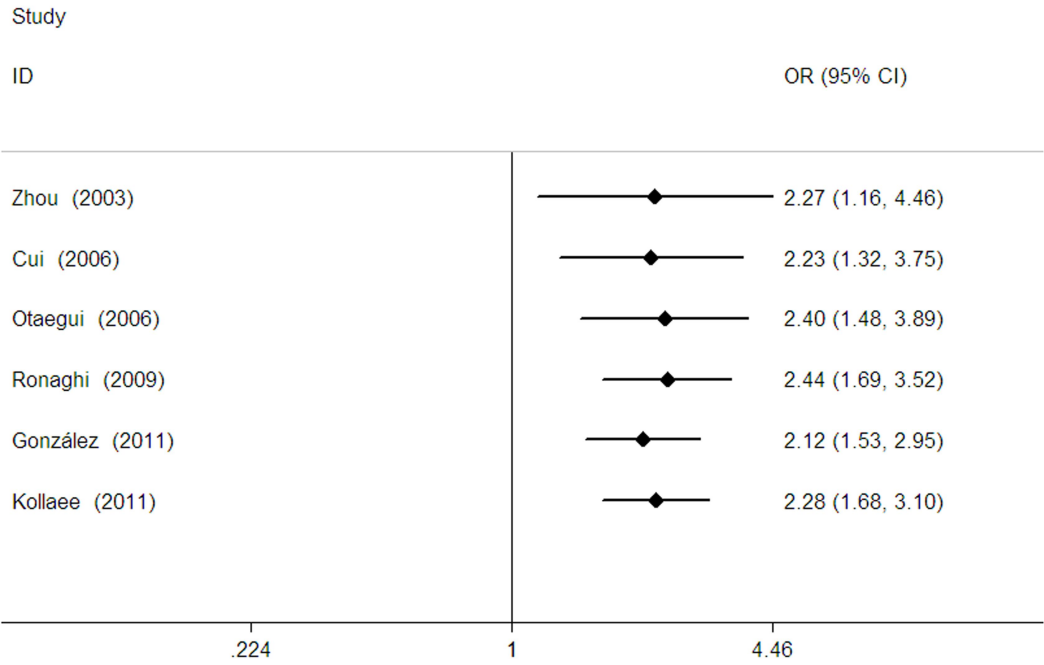

Supplementary Figure 1 Cumulative meta-analysis of the *CD24* Ala57Val polymorphism and MS risk.

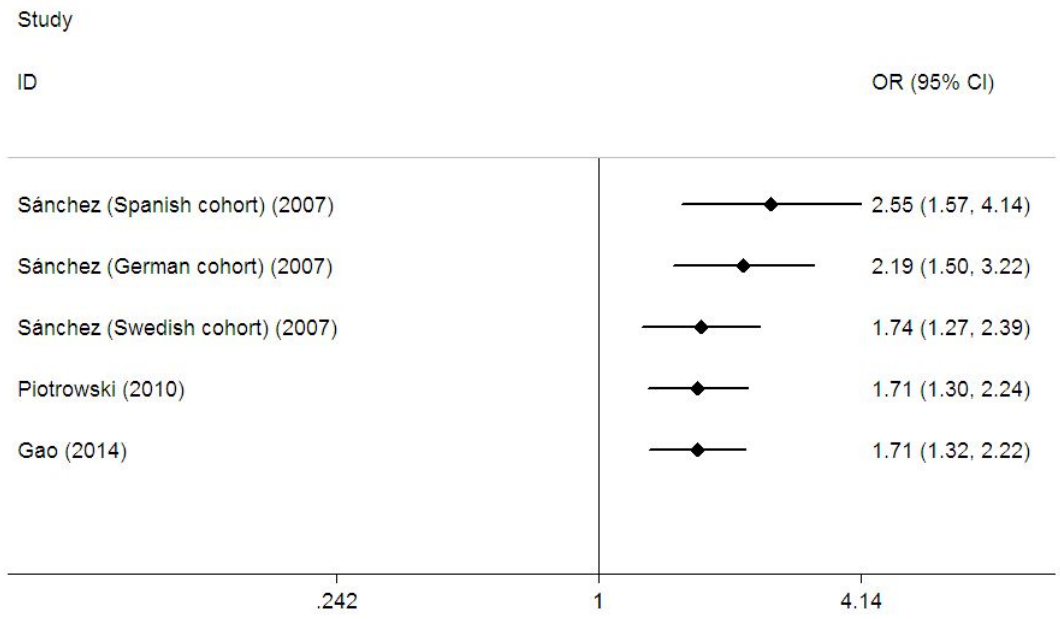

Supplementary Figure 2 Cumulative meta-analysis of the *CD24* Ala57Val polymorphism and SLE risk.
